# Supplementary material for: Clinical Features of Li-Fraumeni Syndrome in Korea
Source: PubMed Central journal article supplement — Cancer Res Treat. 2023 Aug 9;56(1):334–41. doi: 10.4143/crt.2023.794 (PMC10789946; doi:10.4143/crt.2023.794), 2023-08-09
Supplement: crt-2023-794-Supplementary-Table-S1.pdf [file crt-2023-794-Supplementary-Table-S1.pdf]

**S1 Table.** The results of tumor biomarker testing on cancer specimen

| Tumor type         | Biomarker                        | Patient | Result                |
|--------------------|----------------------------------|---------|-----------------------|
| Thyroid cancer     | <i>BRAF</i> (codon 600) mutation | 2       | Unknown               |
|                    |                                  | 9       | <i>BRAF</i> mutated   |
|                    |                                  | 11      | <i>BRAF</i> wild-type |
| Pancreatic cancer  | <i>KRAS</i> mutation             | 13      | Unknown               |
|                    |                                  | 14      | Unknown               |
| Ovarian cancer     | <i>BRCA1/2</i> mutation          | 12      | <i>BRCA1</i> mutated  |
| Endometrial cancer | MMR protein                      | 9       | No dMMR               |
| Colon cancer       | <i>KRAS/NRAS/BRAF</i> mutation   | 5       | Unknown               |

dMMR, DNA mismatch repair deficiency; MMR, mismatch repair.
